# Supplementary material
Source: Springer Nature journal article supplement (https://www.springermedizin.de/resource/supplementary/12931_2011_1168_MOESM1_ESM.pdf/9425444)

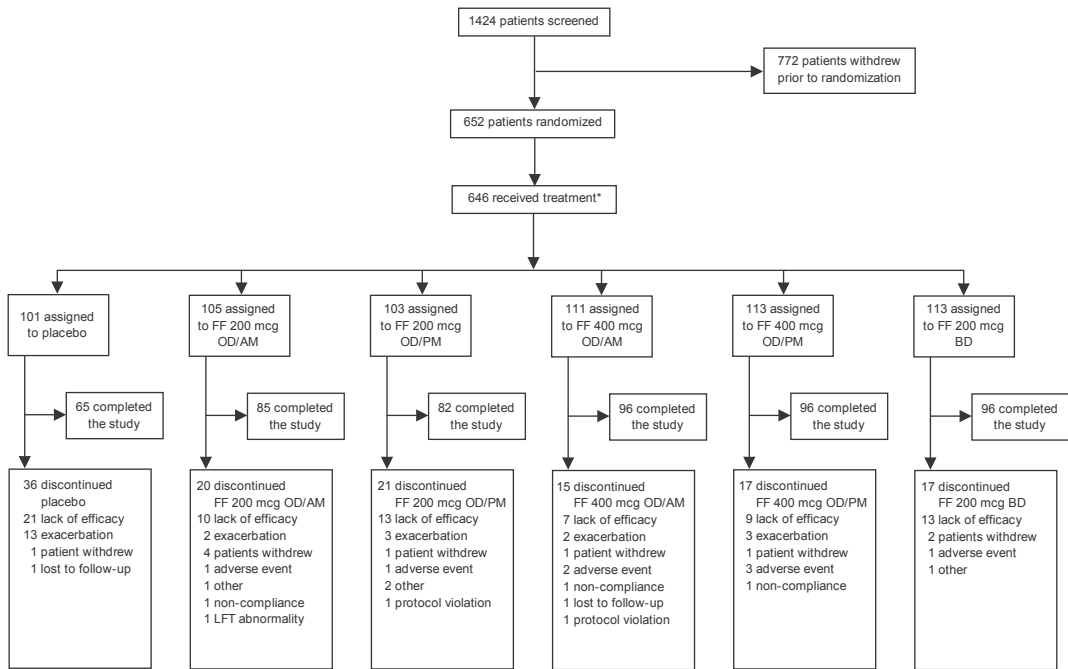

Supplement: MOESM1 [file 9425444]
